# Supplementary material for: Effect of four-week cannabidiol treatment on cognitive function: secondary outcomes from a randomised clinical trial for the treatment of cannabis use disorder
Source: Springer Nature journal article supplement (doi:10.1007/s00213-022-06303-5), 2023-01-04
Supplement: MOESM1 [file 213_2022_6303_MOESM1_ESM.pdf]

# **Effect of four-week cannabidiol treatment on cognitive function: secondary outcomes from a randomised clinical trial for the treatment of cannabis use disorder**

## **Psychopharmacology**

### **Authors**

Rachel Lees, Lindsey Hines, Chandni Hindocha, Gianluca Baio, Natacha D C Shaban, George Stothart, Ali Mofeez, Celia J A Morgan, H Valerie Curran, Tom P Freeman

Corresponding author: Rachel Lees (rhl32@bath.ac.uk)

## **SUPPLEMENTARY MATERIALS**

|                                         |    |
|-----------------------------------------|----|
| Table of Contents .....                 | 1  |
| Secondary outcome analyses .....        | 2  |
| Immediate prose recall .....            | 2  |
| SSRT .....                              | 4  |
| Trail making task – Part A .....        | 6  |
| Trail making task – Part B- Part A..... | 7  |
| Digit Span .....                        | 9  |
| Backwards digit span .....              | 10 |
| Letter (phonemic) fluency.....          | 12 |
| Category (semantic) fluency .....       | 14 |
| Drug Fluency .....                      | 16 |
| Exploratory Bayes Factors .....         | 18 |

## Secondary outcome analyses

### Immediate prose recall

**Table S1**

Data show model estimates of the effect of dose, time, and dose by time interaction on immediate prose recall.

|                                     | Estimate | SE   | Df     | <i>t</i> -value | Lower CI | Upper CI |
|-------------------------------------|----------|------|--------|-----------------|----------|----------|
| Intercept                           | 7.24     | 0.62 | 117.48 | 11.63           | 5.88     | 8.38     |
| Placebo                             | -        | -    | -      | -               | -        | -        |
| 400mg CBD                           | -0.18    | 0.87 | 117.48 | -0.20           | -1.90    | 1.72     |
| 800mg CBD                           | 0.67     | 0.88 | 117.48 | 0.77            | -1.02    | 2.47     |
| Baseline                            | -        | -    | -      | -               | -        | -        |
| Week 4                              | 1.49     | 0.72 | 67.34  | 2.09            | 0.11     | 2.83     |
| Dose by time<br>(Placebo, Baseline) | -        | -    | -      | -               | -        | -        |
| Dose by time (400mg<br>CBD, Week 4) | 0.92     | 1.00 | 67.32  | 0.92            | -0.95    | 3.02     |
| Dose by time (800mg<br>CBD, Week 4) | 1.57     | 1.00 | 66.71  | 1.57            | -0.31    | 3.50     |

CI = 95% confidence interval, bootstrapped. SE = Standard Error. Df = Degrees of freedom.

**Table S2**

Change from baseline to week 4 (end of treatment) for scores on immediate prose recall, by treatment group.

| Contrast             | Treatment | Estimate | SE   | Df    | Lower CI | Upper CI |
|----------------------|-----------|----------|------|-------|----------|----------|
| Week 4 -<br>Baseline | Placebo   | 0.75     | 0.36 | 66.47 | 0.06     | 1.41     |
| Week 4 -<br>Baseline | 400mg CBD | 1.21     | 0.35 | 66.42 | 0.53     | 1.92     |
| Week 4 -<br>Baseline | 800mg CBD | 1.53     | 0.35 | 65.20 | 0.82     | 2.23     |

CI = 95% confidence interval, bootstrapped. SE = Standard Error. Df = Degrees of freedom.

**Figure S1**

Group means of idea units recalled at the immediate measurement of the prose recall task, by treatment group at baseline and week 4. Error bars represent bootstrapped 95% confidence intervals.

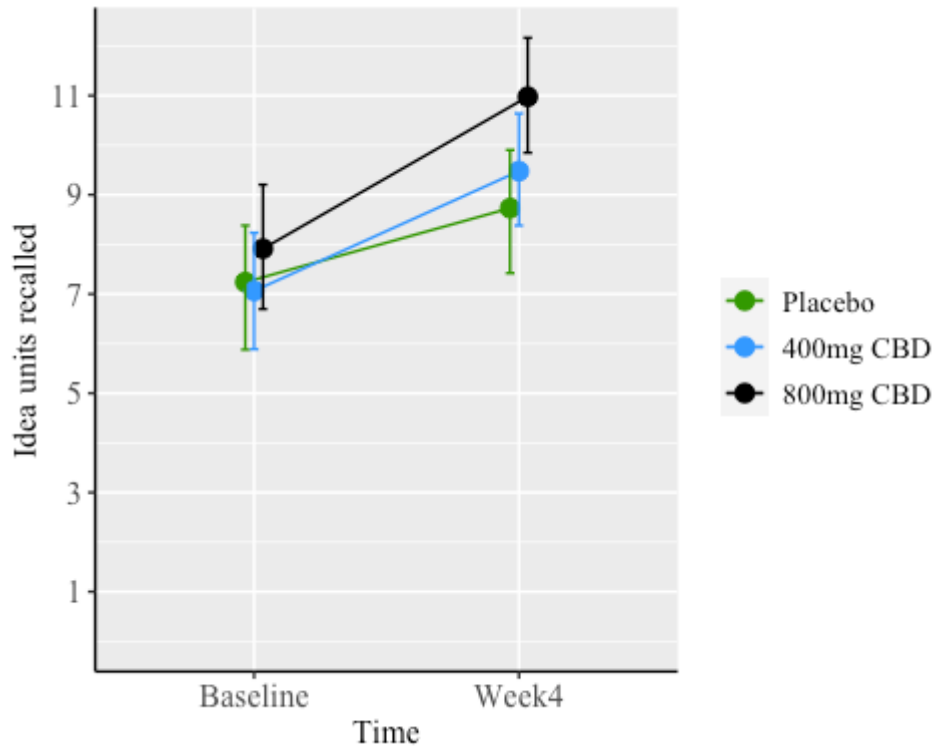

**SSRT****Table S3**

Data show model estimates of the effect of dose, time, and dose by time interaction on SSRT.

|                                     | Estimate | SE    | Df     | <i>t</i> -value | Lower CI | Upper CI |
|-------------------------------------|----------|-------|--------|-----------------|----------|----------|
| Intercept                           | 257.21   | 11.19 | 110.26 | 22.99           | 232.78   | 277.34   |
| Placebo                             | -        | -     | -      | -               | -        | -        |
| 400mg CBD                           | -5.50    | 15.65 | 110.26 | -0.35           | -36.47   | 28.58    |
| 800mg CBD                           | -3.27    | 15.82 | 110.26 | -0.21           | -34.22   | 28.40    |
| Baseline                            | -        | -     | -      | -               | -        | -        |
| Week 4                              | -18.44   | 11.90 | 66.96  | -1.55           | -41.56   | 3.52     |
| Dose by time<br>(Placebo, Baseline) | -        | -     | -      | -               | -        | -        |
| Dose by time (400mg<br>CBD, Week 4) | 7.36     | 16.64 | 66.94  | 0.44            | -23.80   | 42.22    |
| Dose by time (800mg<br>CBD, Week 4) | 5.01     | 16.69 | 66.39  | 0.30            | -26.41   | 37.22    |

CI = 95% confidence interval, bootstrapped. SE = Standard Error. Df = Degrees of freedom.

**Table S4**

Change from baseline to week 4 (end of treatment) for scores on SSRT, by treatment group.

| Contrast             | Treatment | Estimate | SE   | Df    | Lower CI | Upper CI |
|----------------------|-----------|----------|------|-------|----------|----------|
| Week 4 -<br>Baseline | Placebo   | -9.22    | 5.95 | 66.30 | -20.78   | 1.76     |
| Week 4 -<br>Baseline | 400mg CBD | -5.54    | 5.82 | 66.26 | -16.68   | 6.46     |
| Week 4 -<br>Baseline | 800mg CBD | -6.72    | 5.85 | 65.15 | -18.60   | 4.87     |

CI = 95% confidence interval, bootstrapped. SE = Standard Error. Df = Degrees of freedom.

**Figure S2**

Group means of SSRT score, by treatment group at baseline and week 4. Error bars represent bootstrapped 95% confidence intervals.

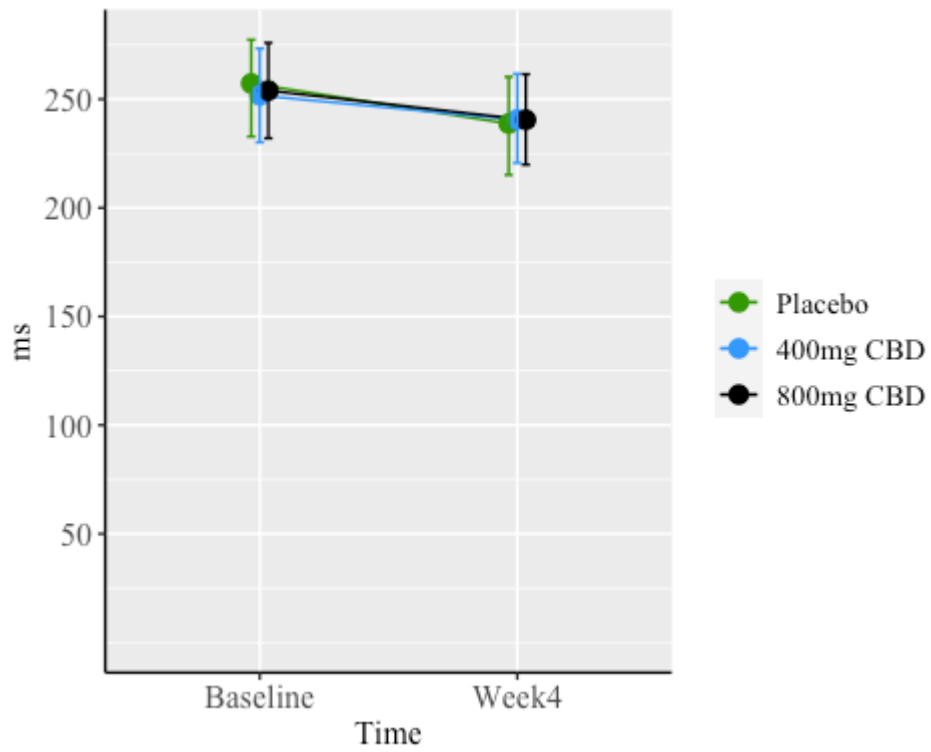

**Trail making task – Part A**

**Table S5**

Data show model estimates of the effect of dose, time, and dose by time interaction on Part A of the trail making task

|                                  | Estimate | SE   | Df     | <i>t</i> -value | Lower CI | Upper CI |
|----------------------------------|----------|------|--------|-----------------|----------|----------|
| Intercept                        | 24.29    | 1.43 | 103.83 | 16.95           | 21.15    | 26.90    |
| Placebo                          | -        | -    | -      | -               | -        | -        |
| 400mg CBD                        | 1.31     | 2.01 | 103.83 | 0.65            | -2.57    | 5.67     |
| 800mg CBD                        | -2.26    | 2.03 | 103.83 | -1.12           | -6.22    | 1.80     |
| Baseline                         | -        | -    | -      | -               | -        | -        |
| Week 4                           | -3.51    | 1.43 | 65.13  | -2.45           | -6.30    | -0.89    |
| Dose by time (Placebo, Baseline) | -        | -    | -      | -               | -        | -        |
| Dose by time (400mg CBD, Week 4) | -0.74    | 2.00 | 65.10  | -0.37           | -4.49    | 3.45     |
| Dose by time (800mg CBD, Week 4) | 0.94     | 2.01 | 64.60  | 0.47            | -2.83    | 4.80     |

CI = 95% confidence interval, bootstrapped. SE = Standard Error. Df = Degrees of freedom.

**Table S6**

Change from baseline to week 4 (end of treatment) for scores on part A of the trail making task, by treatment group.

| Contrast          | Treatment | Estimate | SE   | Df    | Lower CI | Upper CI |
|-------------------|-----------|----------|------|-------|----------|----------|
| Week 4 - Baseline | Placebo   | -1.75    | 0.72 | 66.18 | -3.15    | -0.44    |
| Week 4 - Baseline | 400mg CBD | -2.13    | 0.70 | 66.13 | -3.47    | -0.67    |
| Week 4 - Baseline | 800mg CBD | -1.28    | 0.70 | 65.11 | -2.71    | 0.11     |

CI = 95% confidence interval, bootstrapped. SE = Standard Error. Df = Degrees of freedom.

## Trail making task – Part B- Part A

**Table S7**

Data show model estimates of the effect of dose, time, and dose by time interaction on Part B – Part A of the trail making task

|                                     | Estimate | SE   | Df     | t-value | Lower CI | Upper CI |
|-------------------------------------|----------|------|--------|---------|----------|----------|
| Intercept                           | 36.94    | 4.77 | 120.60 | 7.75    | 26.79    | 45.53    |
| Placebo                             | -        | -    | -      | -       | -        | -        |
| 400mg CBD                           | -9.61    | 6.67 | 120.60 | -1.44   | -22.54   | 4.75     |
| 800mg CBD                           | -10.35   | 6.74 | 120.60 | -1.54   | -23.31   | 3.31     |
| Baseline                            | -        | -    | -      | -       | -        | -        |
| Week 4                              | 1.35     | 5.67 | 67.25  | 0.24    | -9.63    | 11.91    |
| Dose by time<br>(Placebo, Baseline) | -        | -    | -      | -       | -        | -        |
| Dose by time (400mg<br>CBD, Week 4) | 0.52     | 7.93 | 67.22  | 0.07    | -14.28   | 17.09    |
| Dose by time (800mg<br>CBD, Week 4) | 12.09    | 7.96 | 66.60  | 1.52    | -2.82    | 27.32    |

CI = 95% confidence interval, bootstrapped. SE = Standard Error. Df = Degrees of freedom.

**Table S8**

Change from baseline to week 4 (end of treatment) for scores on Part B – Part A of the trail making task, by treatment group.

| Contrast             | Treatment | Estimate | SE   | Df    | Lower CI | Upper CI |
|----------------------|-----------|----------|------|-------|----------|----------|
| Week 4 -<br>Baseline | Placebo   | 0.67     | 2.84 | 66.55 | -4.82    | 5.95     |
| Week 4 -<br>Baseline | 400mg CBD | 0.93     | 2.77 | 66.50 | -4.44    | 6.53     |
| Week 4 -<br>Baseline | 800mg CBD | 6.72     | 2.79 | 65.23 | 1.05     | 12.25    |

CI = 95% confidence interval, bootstrapped. SE = Standard Error. Df = Degrees of freedom.

**Figure S3**

Group means of time taken to complete Part A of the Trail making Task (3a), and Part B – A (3b), by treatment group at baseline and week 4. Error bars represent bootstrapped 95% confidence intervals.

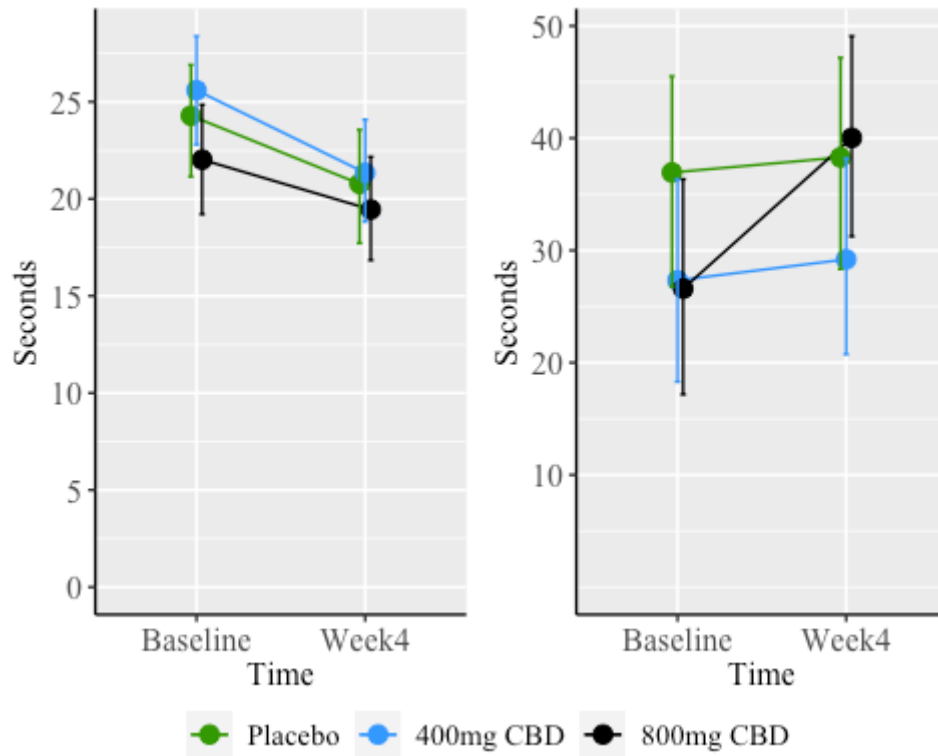

## Digit Span

**Table S9**

Data show model estimates of the effect of dose, time, and dose by time interaction on digit span.

|                                     | Estimate | SE   | Df    | <i>t</i> -value | Lower CI | Upper CI |
|-------------------------------------|----------|------|-------|-----------------|----------|----------|
| Intercept                           | 6.96     | 0.26 | 97.79 | 27.26           | 6.40     | 7.43     |
| Placebo                             | -        | -    | -     | -               | -        | -        |
| 400mg CBD                           | 0.63     | 0.36 | 97.79 | 1.76            | -0.07    | 1.39     |
| 800mg CBD                           | 0.43     | 0.36 | 97.79 | 1.20            | -0.27    | 1.17     |
| Baseline                            | -        | -    | -     | -               | -        | -        |
| Week 4                              | 0.18     | 0.23 | 66.20 | 0.78            | -0.28    | 0.61     |
| Dose by time<br>(Placebo, Baseline) | -        | -    | -     | -               | -        | -        |
| Dose by time (400mg<br>CBD, Week 4) | -0.16    | 0.33 | 66.18 | -0.50           | -0.77    | 0.52     |
| Dose by time (800mg<br>CBD, Week 4) | 0.04     | 0.33 | 65.74 | 0.11            | -0.58    | 0.66     |

CI = 95% confidence interval, bootstrapped. SE = Standard Error. Df = Degrees of freedom.

**Table S10**

Change from baseline to week 4 (end of treatment) for digits repeated on the digit span test, by treatment group.

| Contrast             | Treatment | Estimate | SE   | Df    | Lower CI | Upper CI |
|----------------------|-----------|----------|------|-------|----------|----------|
| Week 4 -<br>Baseline | Placebo   | 0.09     | 0.12 | 66.00 | -0.14    | 0.30     |
| Week 4 -<br>Baseline | 400mg CBD | 0.01     | 0.11 | 65.97 | -0.21    | 0.25     |
| Week 4 -<br>Baseline | 800mg CBD | 0.11     | 0.11 | 65.08 | -0.12    | 0.33     |

CI = 95% confidence interval, bootstrapped. SE = Standard Error. Df = Degrees of freedom.

## Backwards digit span

**Table S11**

Data show model estimates of the effect of dose, time, and dose by time interaction on backwards digit span.

|                                     | Estimate | SE   | Df     | <i>t</i> -value | Lower CI | Upper CI |
|-------------------------------------|----------|------|--------|-----------------|----------|----------|
| Intercept                           | 5.17     | 0.27 | 109.54 | 19.23           | 4.59     | 5.66     |
| Placebo                             | -        | -    | -      | -               | -        | -        |
| 400mg CBD                           | -0.17    | 0.38 | 109.54 | -0.46           | -0.92    | 0.65     |
| 800mg CBD                           | -0.04    | 0.38 | 109.54 | -0.11           | -0.79    | 0.72     |
| Baseline                            | -        | -    | -      | -               | -        | -        |
| Week 4                              | -0.15    | 0.29 | 65.75  | -0.53           | -0.71    | 0.38     |
| Dose by time<br>(Placebo, Baseline) | -        | -    | -      | -               | -        | -        |
| Dose by time (400mg<br>CBD, Week 4) | 0.41     | 0.40 | 65.72  | 1.02            | -0.34    | 1.25     |
| Dose by time (800mg<br>CBD, Week 4) | 0.76     | 0.40 | 65.17  | 1.90            | 0.01     | 1.54     |

CI = 95% confidence interval, bootstrapped. SE = Standard Error. Df = Degrees of freedom.

**Table S12**

Change from baseline to week 4 (end of treatment) for digits repeated backwards, by treatment group

| Contrast             | Treatment | Estimate | SE   | Df    | Lower CI | Upper CI |
|----------------------|-----------|----------|------|-------|----------|----------|
| Week 4 -<br>Baseline | Placebo   | -0.08    | 0.14 | 66.30 | -0.35    | 0.19     |
| Week 4 -<br>Baseline | 400mg CBD | 0.13     | 0.14 | 66.25 | -0.14    | 0.42     |
| Week 4 -<br>Baseline | 800mg CBD | 0.30     | 0.14 | 65.15 | 0.02     | 0.58     |

CI = 95% confidence interval, bootstrapped. SE = Standard Error. Df = Degrees of freedom.

**Figure S4**

Group means on forward and backward digit span by treatment group, at baseline and week 4. Error bars represent bootstrapped 95% confidence intervals.

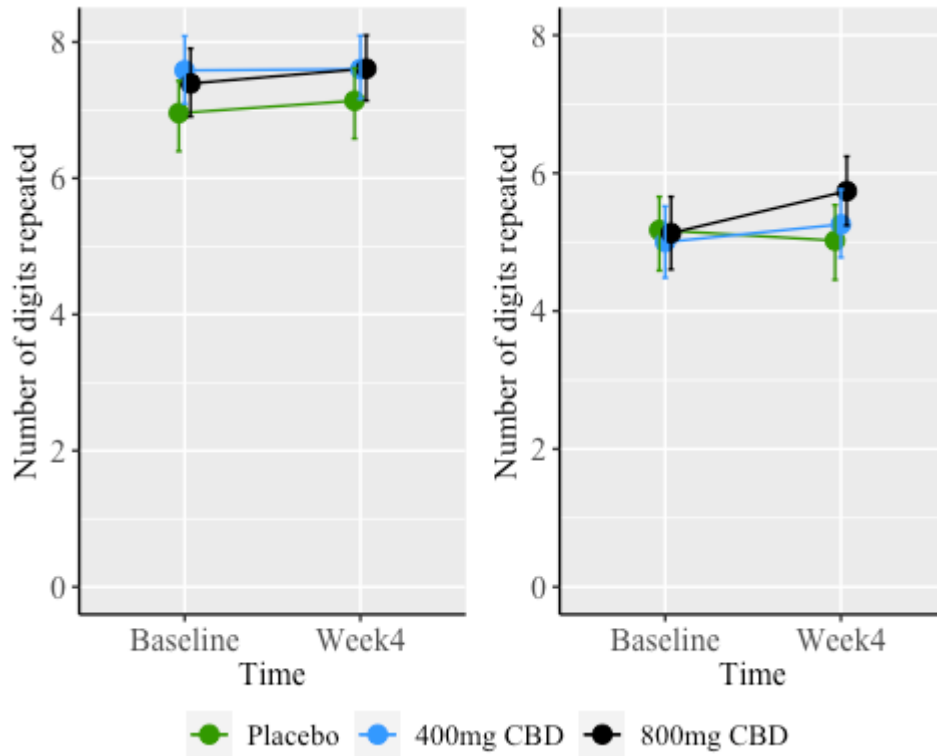

## Letter (phonemic) fluency

**Table S13**

Data show model estimates of the effect of dose, time, and dose by time interaction on letter fluency.

|                                     | Estimate | SE   | Df     | <i>t</i> -value | Lower CI | Upper CI |
|-------------------------------------|----------|------|--------|-----------------|----------|----------|
| Intercept                           | 12.57    | 0.99 | 106.49 | 12.73           | 10.40    | 14.38    |
| Placebo                             | -        | -    | -      | -               | -        | -        |
| 400mg CBD                           | 0.89     | 1.38 | 106.49 | 0.65            | -1.82    | 3.88     |
| 800mg CBD                           | -0.13    | 1.40 | 106.49 | -0.09           | -2.85    | 2.64     |
| Baseline                            | -        | -    | -      | -               | -        | -        |
| Week 4                              | -0.31    | 1.01 | 66.61  | -0.30           | -2.27    | 1.54     |
| Dose by time<br>(Placebo, Baseline) | -        | -    | -      | -               | -        | -        |
| Dose by time (400mg<br>CBD, Week 4) | -0.88    | 1.41 | 66.58  | -0.63           | -3.52    | 2.07     |
| Dose by time (800mg<br>CBD, Week 4) | 0.13     | 1.41 | 66.07  | 0.09            | -2.53    | 2.85     |

CI = 95% confidence interval, bootstrapped. SE = Standard Error. Df = Degrees of freedom.

**Table S14**

Change from baseline to week 4 (end of treatment) for number of letter words recalled, by treatment group.

| Contrast             | Treatment | Estimate | SE   | Df    | Lower CI | Upper CI |
|----------------------|-----------|----------|------|-------|----------|----------|
| Week 4 -<br>Baseline | Placebo   | -0.15    | 0.50 | 66.22 | -1.14    | 0.77     |
| Week 4 -<br>Baseline | 400mg CBD | -0.59    | 0.49 | 66.17 | -1.54    | 0.43     |
| Week 4 -<br>Baseline | 800mg CBD | -0.09    | 0.50 | 65.12 | -1.09    | 0.89     |

CI = 95% confidence interval, bootstrapped. SE = Standard Error. Df = Degrees of freedom.

**Figure S5**

Group means of number of words recalled on the letter fluency task by treatment group, at baseline and week 4. Error bars represent bootstrapped 95% confidence intervals.

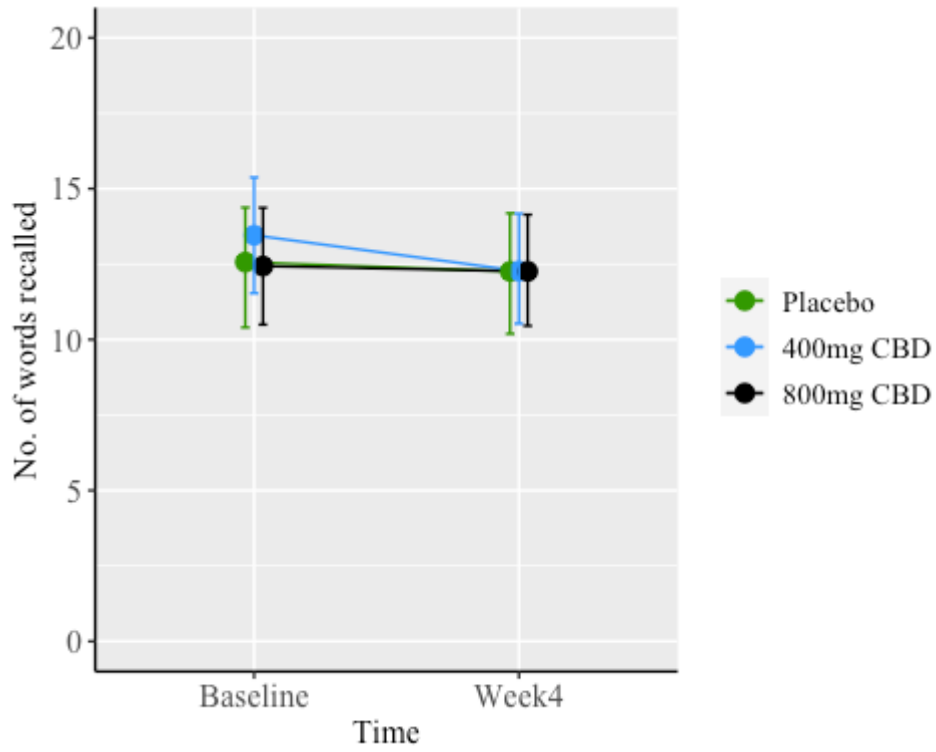

## Category (semantic) fluency

**Table S15**

Data show model estimates of the effect of dose, time, and dose by time interaction on category (semantic) fluency.

|                                     | Estimate | SE   | Df     | <i>t</i> -value | Lower CI | Upper CI |
|-------------------------------------|----------|------|--------|-----------------|----------|----------|
| Intercept                           | 13.48    | 0.89 | 104.00 | 15.15           | 11.53    | 15.10    |
| Placebo                             | -        | -    | -      | -               | -        | -        |
| 400mg CBD                           | 1.23     | 1.24 | 104.00 | 0.99            | -1.16    | 3.92     |
| 800mg CBD                           | -0.26    | 1.26 | 104.00 | -0.21           | -2.72    | 2.27     |
| Baseline                            | -        | -    | -      | -               | -        | -        |
| Week 4                              | 2.60     | 0.88 | 66.61  | 2.96            | 0.88     | 4.21     |
| Dose by time<br>(Placebo, Baseline) | -        | -    | -      | -               | -        | -        |
| Dose by time (400mg<br>CBD, Week 4) | -1.37    | 1.23 | 66.59  | -1.11           | -3.67    | 1.21     |
| Dose by time (800mg<br>CBD, Week 4) | -1.34    | 1.23 | 66.09  | -1.09           | -3.66    | 1.03     |

CI = 95% confidence interval, bootstrapped. SE = Standard Error. Df = Degrees of freedom.

**Table S16**

Change from baseline to week 4 (end of treatment) for number of category (semantic) words recalled, by treatment group.

| Contrast             | Treatment | Estimate | SE   | Df    | Lower CI | Upper CI |
|----------------------|-----------|----------|------|-------|----------|----------|
| Week 4 -<br>Baseline | Placebo   | 1.30     | 0.44 | 66.16 | 0.44     | 2.11     |
| Week 4 -<br>Baseline | 400mg CBD | 0.62     | 0.43 | 66.11 | -0.21    | 1.51     |
| Week 4 -<br>Baseline | 800mg CBD | 0.63     | 0.43 | 65.11 | -0.25    | 1.49     |

CI = 95% confidence interval, bootstrapped. SE = Standard Error. Df = Degrees of freedom.

**Figure S6**

Group means of number of words recalled on the category fluency task by treatment group, at baseline and week 4. Error bars represent bootstrapped 95% confidence intervals.

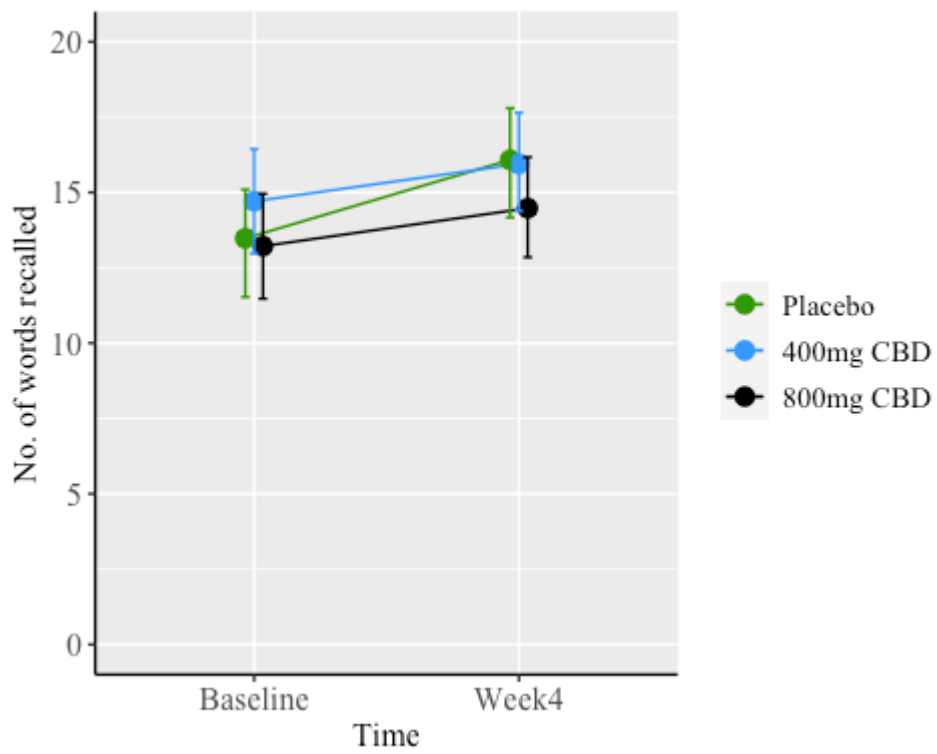

**Drug Fluency****Table S17**

Data show model estimates of the effect of dose, time, and dose by time interaction on drug (cannabis) fluency.

|                                     | Estimate | SE   | Df    | <i>t</i> -value | Lower CI | Upper CI |
|-------------------------------------|----------|------|-------|-----------------|----------|----------|
| Intercept                           | 18.78    | 1.14 | 88.96 | 16.51           | 16.36    | 20.91    |
| Placebo                             | -        | -    | -     | -               | -        | -        |
| 400mg CBD                           | 0.68     | 1.59 | 88.96 | 0.42            | -2.53    | 4.08     |
| 800mg CBD                           | -0.43    | 1.61 | 88.96 | -0.27           | -3.61    | 2.91     |
| Baseline                            | -        | -    | -     | -               | -        | -        |
| Week 4                              | -1.42    | 0.89 | 66.13 | -1.60           | -3.17    | 0.21     |
| Dose by time<br>(Placebo, Baseline) | -        | -    | -     | -               | -        | -        |
| Dose by time (400mg<br>CBD, Week 4) | -0.27    | 1.24 | 66.12 | -0.22           | -2.59    | 2.32     |
| Dose by time (800mg<br>CBD, Week 4) | 1.07     | 1.24 | 65.78 | 0.86            | -1.26    | 3.46     |

CI = 95% confidence interval, bootstrapped. SE = Standard Error. Df = Degrees of freedom.

**Table S18**

Change from baseline to week 4 (end of treatment) for number of drug (cannabis) words recalled, by treatment group.

| Contrast             | Treatment | Estimate | SE   | Df    | Lower CI | Upper CI |
|----------------------|-----------|----------|------|-------|----------|----------|
| Week 4 -<br>Baseline | Placebo   | -0.71    | 0.44 | 65.76 | -1.59    | 0.10     |
| Week 4 -<br>Baseline | 400mg CBD | -0.84    | 0.43 | 65.73 | -1.68    | 0.05     |
| Week 4 -<br>Baseline | 800mg CBD | -0.17    | 0.44 | 65.04 | -1.06    | 0.69     |

CI = 95% confidence interval, bootstrapped. SE = Standard Error. Df = Degrees of freedom.

**Figure S7**

Group means of number of words recalled on the drug fluency task by treatment group, at baseline and week 4. Error bars represent bootstrapped 95% confidence intervals.

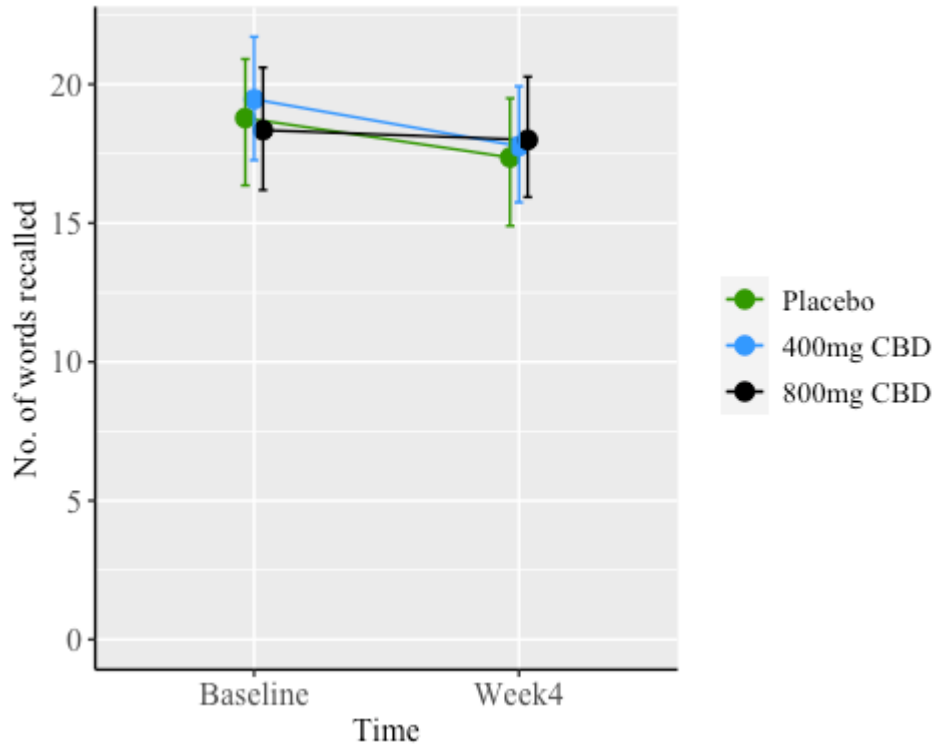

## Exploratory Bayes Factors

**Table S19**

Omnibus Bayes Factors for dose by time interaction in all models with null findings at 95% confidence interval level

| Outcome                | Bayes Factor |
|------------------------|--------------|
| Prose Recall Delayed   | 0.057        |
| Prose Recall Immediate | 0.121        |
| SSRT                   | 0.041        |
| TMT Part A             | 0.057        |
| TMT Part B – Part A    | 0.153        |
| Digit Span             | 0.048        |
| Letter fluency         | 0.052        |
| Category fluency       | 0.073        |
| Drug fluency           | 0.076        |

Bayes Factors between 0.10-0.05 indicate strong evidence for the null hypothesis (1).

Bayes Factors between 0.33–0.10 indicate substantial evidence for the null hypothesis.

1. Jarosz AF, Wiley J. What are the odds? A practical guide to computing and reporting Bayes factors. *J Probl Solving*. 2014;7(1):2.
